# Supplementary material for: ARF suppression by MYC but not MYCN confers increased malignancy of aggressive pediatric brain tumors
Source: PubMed Central journal article supplement (PMC9984535; doi:10.1038/s41467-023-36847-9), 2023-03-03
Supplement: 41467_2023_36847_MOESM1_ESM.pdf [file 41467_2023_36847_MOESM1_ESM.pdf]

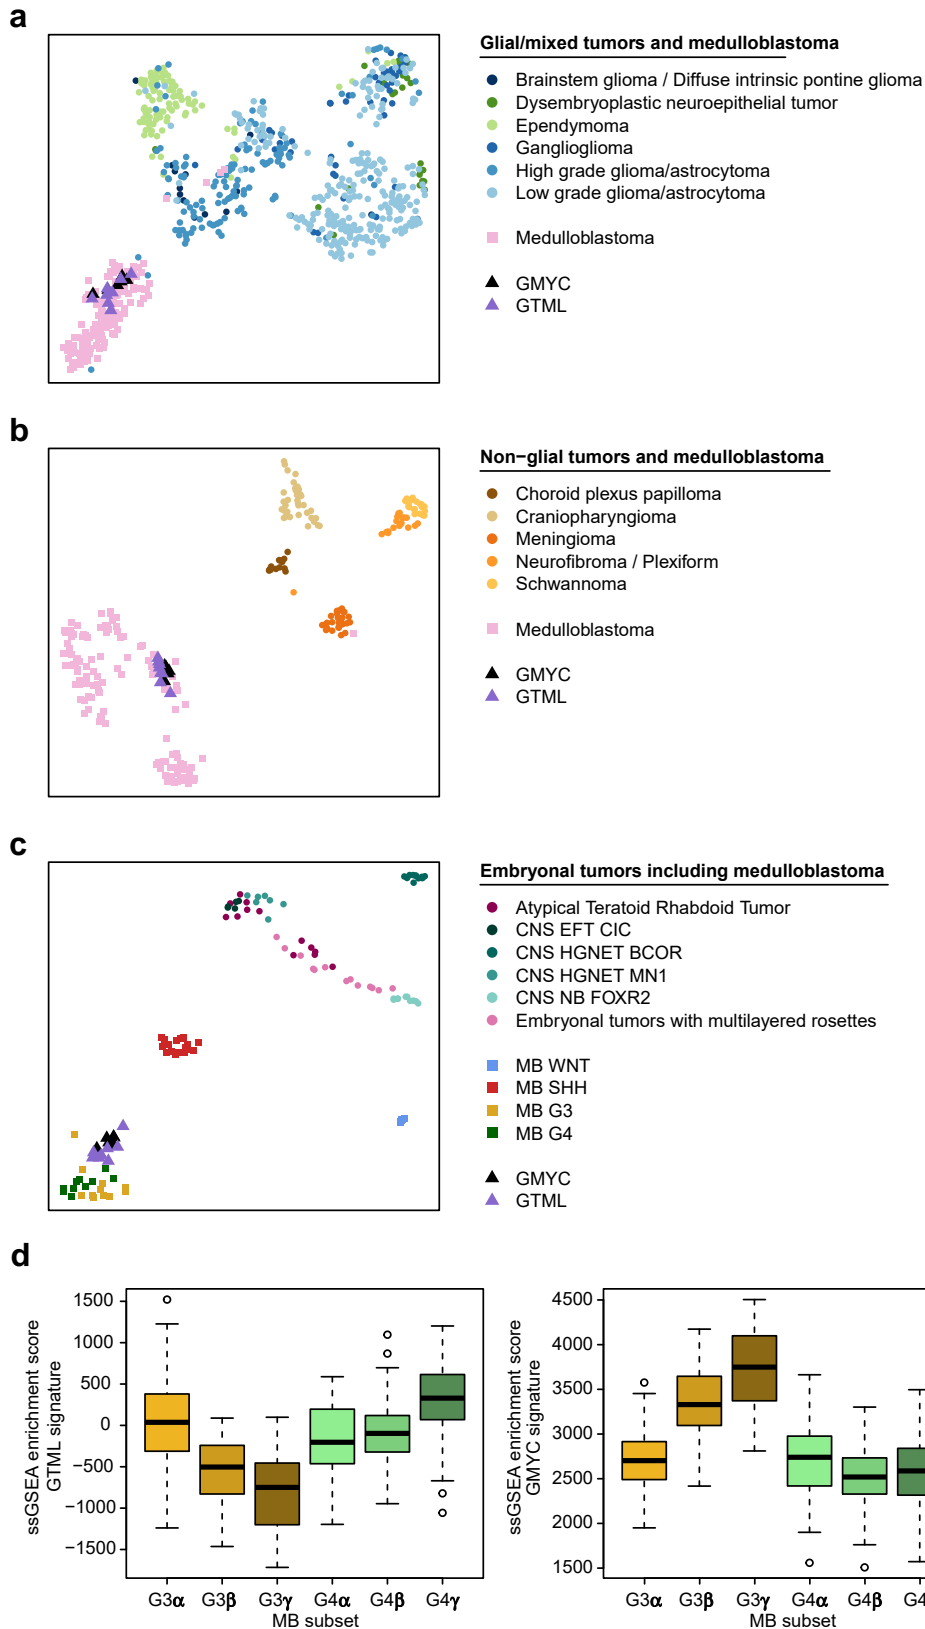

**Supplementary Fig. 1. Cross-species comparison to pediatric tumor data sets demonstrates that GMYC and GTML resemble human MB.**

**a.** t-SNE plot comparing GMYC and GTML tumor samples (colored triangles) to various human glial and mixed brain tumors (colored circles) and MB (squares; human tumor data from CBTTTC database).

**b.** t-SNE plot comparing GMYC and GTML tumor samples (colored triangles) to various human non-glial brain tumors (colored circles) and MB (squares; human tumor data from CBTTTC database).

**c.** t-SNE plot comparing GMYC and GTML tumor samples (colored triangles) to various embryonal brain tumors (colored circles), including MB (squares of different subtypes; human tumor data from GSE73038). All t-SNE plots were produced from the metagene expression values obtained after cross-species mapping of transcriptional profiles from mouse tumors onto human tumors.

**d.** ssGSEA enrichment analysis of GMYC and GTML tumors against human MB subtypes (GSE85217). GTML tumours appear to best resemble G3 $\alpha$  and G4-like MB and GMYC tumors appear to best resemble G3 $\gamma$ -like MB.

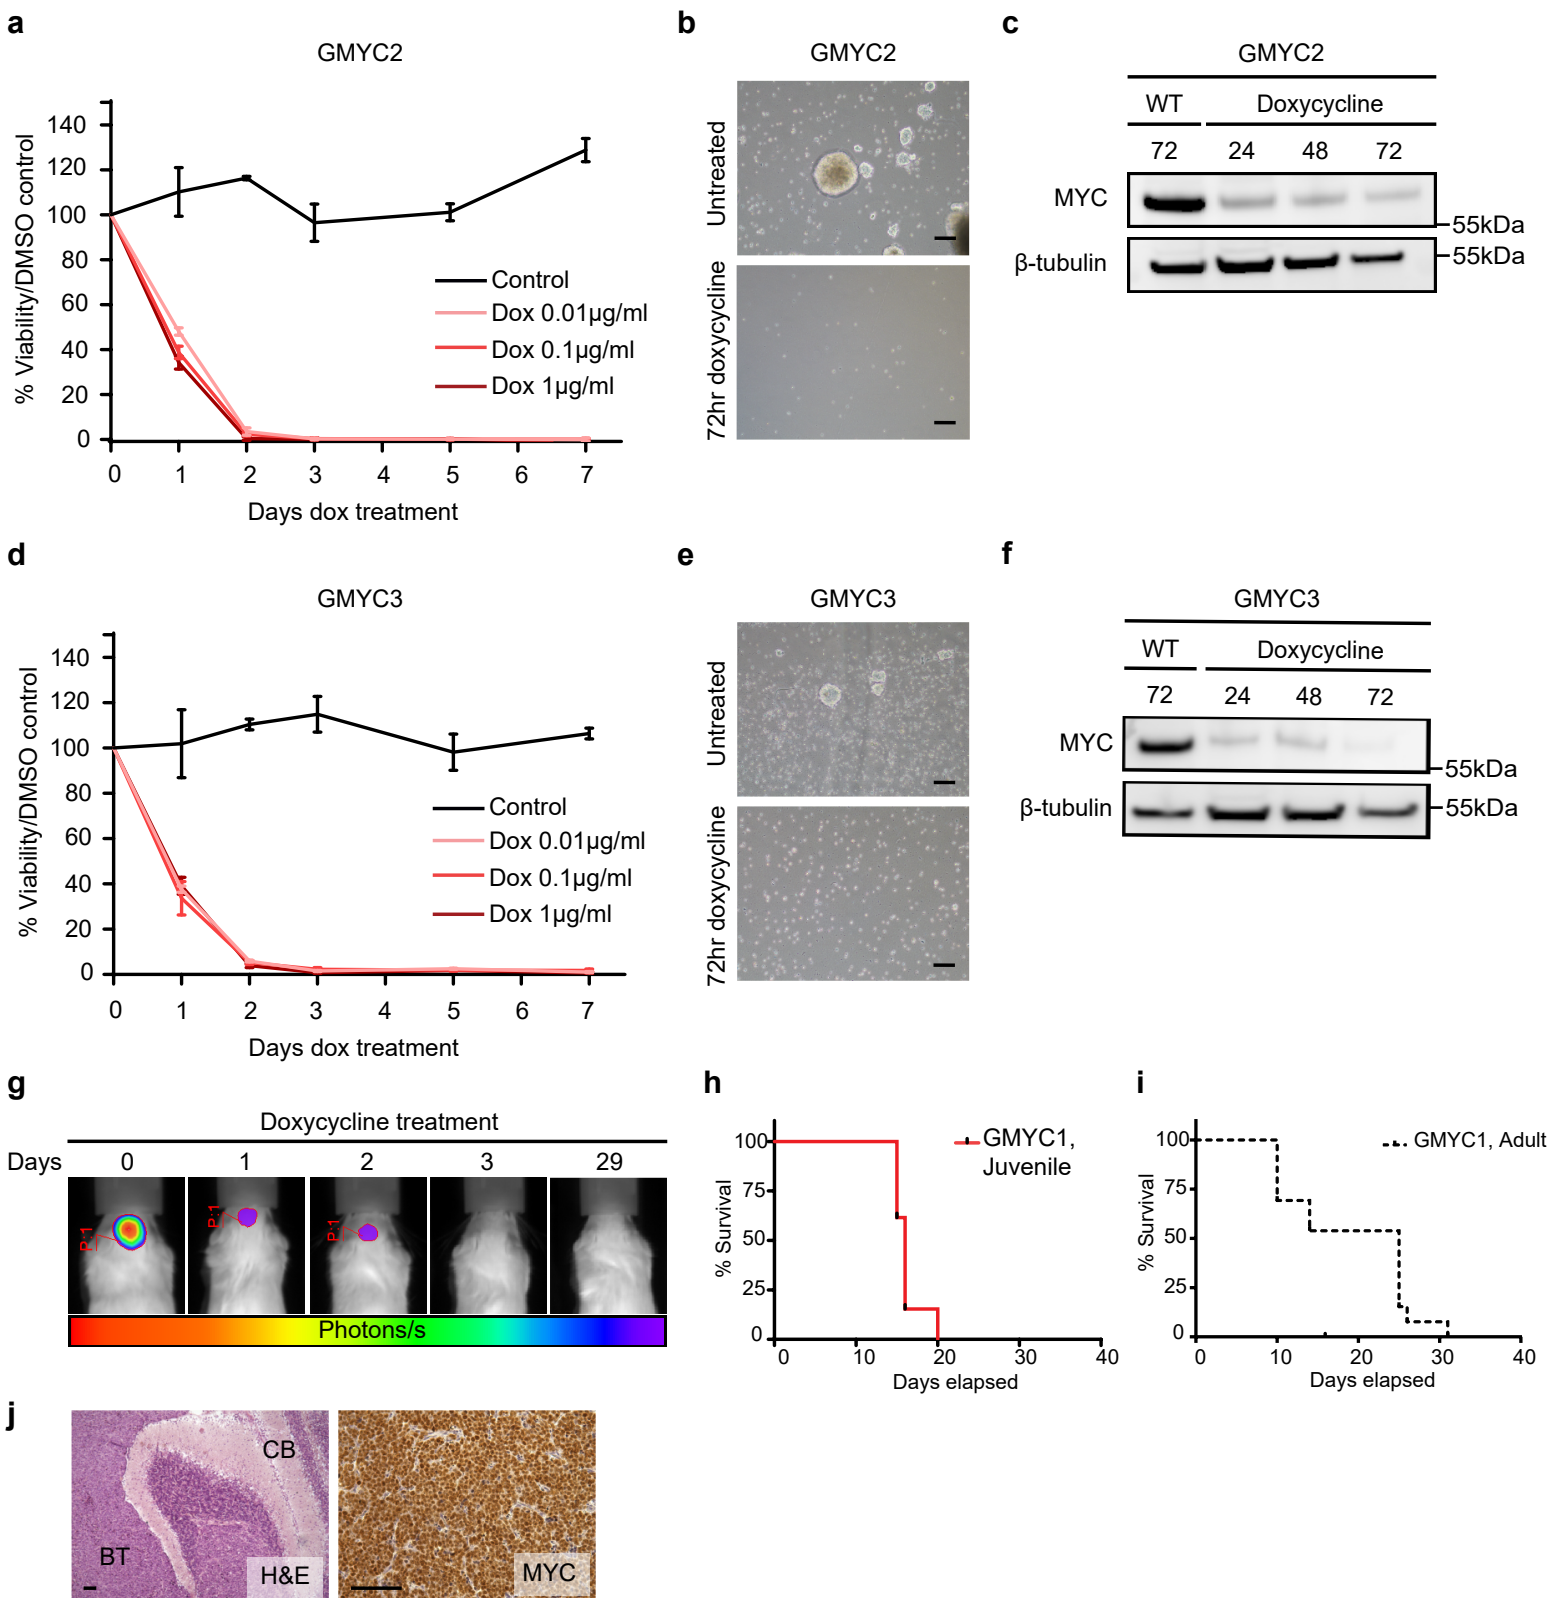

**Supplementary Fig. 2. MYC suppression leads to complete ablation of tumor cells and survival of mice. GMYC tumors likely arise during embryonal development and can be maintained in vitro.**

- a.** GMYC2 cells can be dox treated *in vitro* and are rapidly ablated following exposure. Mean  $\pm$  SD.
- b.** Micrograph of GMYC2 cells growing *in vitro*, both untreated and treated for 72 hours with dox. Scale bars represent 100µM.
- c.** Protein analysis of dox treated GMYC2 cells *in vitro* over 72 hours.
- d.** GMYC3 cells can be dox treated *in vitro* and are rapidly ablated following exposure. Mean  $\pm$  SD.
- e.** Micrograph of GMYC3 cells growing *in vitro*, both untreated and treated for 72 hours with dox. Scale bars represent 100µM.
- f.** Protein analysis of dox treated GMYC3 cells *in vitro*.
- g.** A GMYC/TreCRE-LC1 mouse followed during dox treatment over approx. a month. Day 0 indicates when the tumor was phenotypically visible on the mouse. Dox-mediated MYC suppression rapidly leads to complete clearance of Luc-positive tumor cells.
- h.** Survival plot of juvenile immunocompetent FVBN mice who received cerebellar injections of 200,000 GMYC1 cells.
- i.** Survival plot of adult FVBN mice who received cerebellar injections of 100,000 GMYC1 cells.
- j.** H&E and MYC immunostaining of allografted tumors show cerebellar disruption and high levels of MYC protein. Scale bars represent 100µM.
- All experimental data from immunostainings and treatments (**a-g, j**) was verified from at least two independent biological replicates.

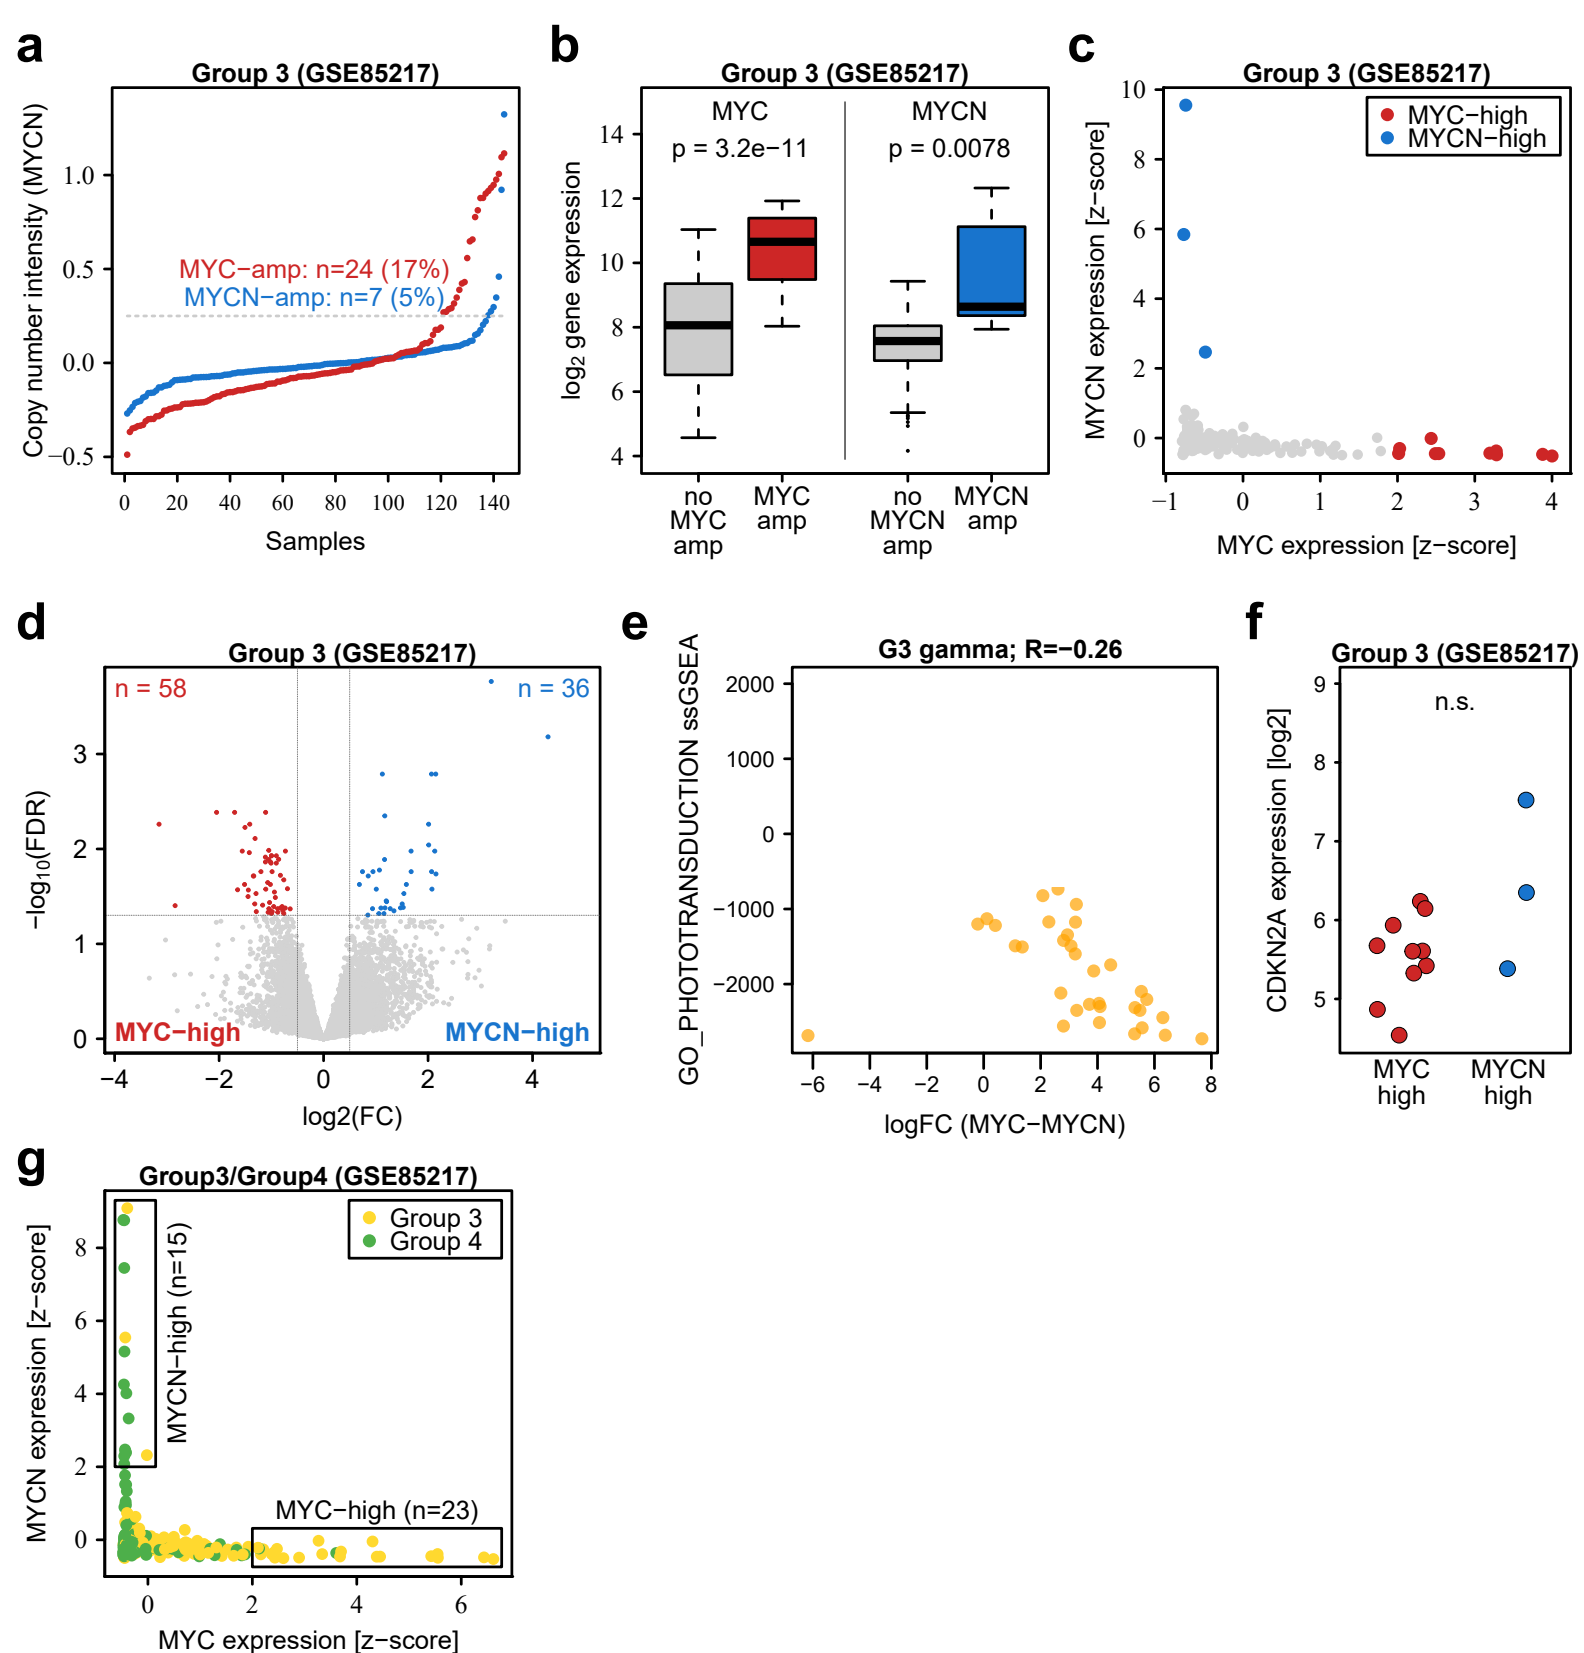

**Supplementary Fig. 3. Identification and comparison of MYC-high/amplified and MYCN-high/amplified Group 3 MBs.**

**a.** Illustration of the estimation of putative copy number events of *MYC* (red) and *MYCN* (blue) in Group 3 MBs based on methylation-derived copy number intensity values. Dashed line indicates the cut off (>0.25) for selecting samples with putative amplification. Numbers above the dashed line represent the identified number of amplified cases for *MYC* (red) and *MYCN* (blue).

**b.** Boxplots comparing the gene expression of *MYCN* or *MYC* between samples with putative amplifications in that gene and samples without the amplification. P-values were computed using one-sided Welch's t-test.

**c.** Scatter plot comparing the z-score of gene expression values (in normal scale) between *MYC* and *MYCN* within Group 3 MBs. MYC-high and MYCN-high samples were selected as those cases with  $z \geq 2$  for the respective gene.

**d.** Volcano plot depicting the differential expression results between the MYC-high (n=10) and MYCN-high (n=3) Group 3 MBs. *MYC* and *MYCN* were removed from the expression data prior to the differential analysis. The horizontal dashed line indicates the FDR=0.05 threshold, while the vertical dashed lines indicate a logFC of -0.5 or 0.5, respectively.

**e.** Scatter plot comparing the ssGSEA enrichment score for a phototransduction gene set (identified in Fig. 4B) with the corresponding *MYC* expression levels in human Group 3-gamma patients. The R-value reflects the Pearson correlation coefficient.

**f.** Strip chart comparing the gene expression of *CDKN2A* between MYC-high (n=10) and MYCN-high (n=3) Group 3 MBs. The p-value (n.s.:  $p > 0.05$ ) was computed using a two-sided Welch's t-test.

**g.** Scatter plot comparing the z-score of gene expression values (in normal scale) between *MYC* and *MYCN* within Group 3 and Group 4 MBs. MYC-high and MYCN-high samples were selected as those cases with  $z \geq 2$  for the respective gene.

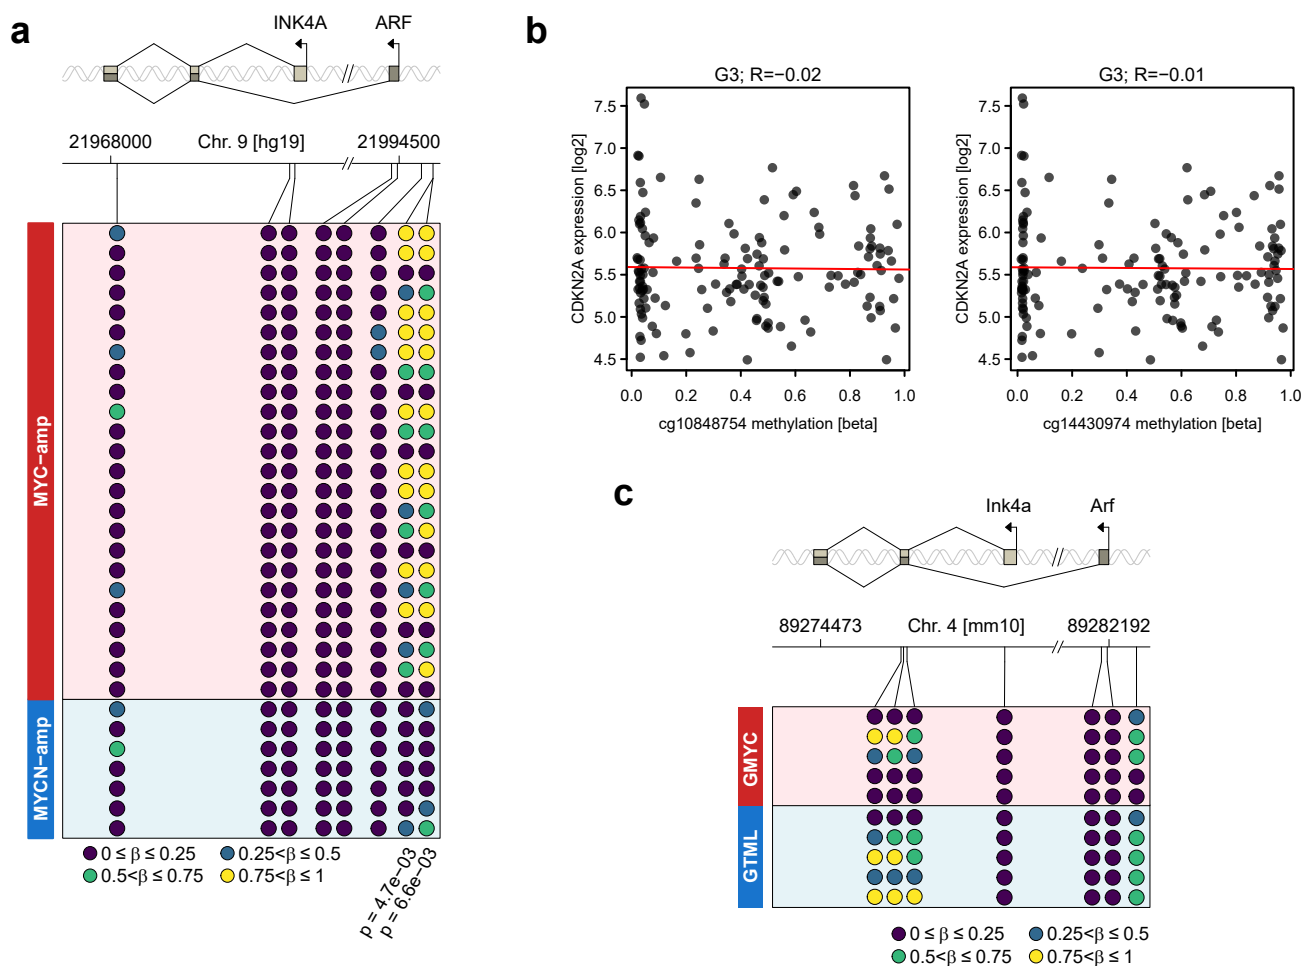

**Supplementary Fig. 4. Methylation analysis of CDKN2A locus in human Gr. 3 MB and in mouse brain tumors.**

**a.** Comparison of *CDKN2A* methylation between human Group 3 samples with putative MYC amplification and Group 3 samples with putative MYCN amplification. The position of CpG probes is shown relative to the exons utilized by *ARF* and/or *INK4A*.

**b.** Comparison of expression levels of *CDKN2A* of hyper- and hypo-methylated samples from human Group 3 MB.

**c.** Comparison of *Cdkn2a* methylation in tumor DNA between GMYC and GTML models using MM285 Infinium Mouse Methylation BeadChip. The position of CpG probes is shown relative to the exons utilized by *Arf* and/or *Ink4a*.

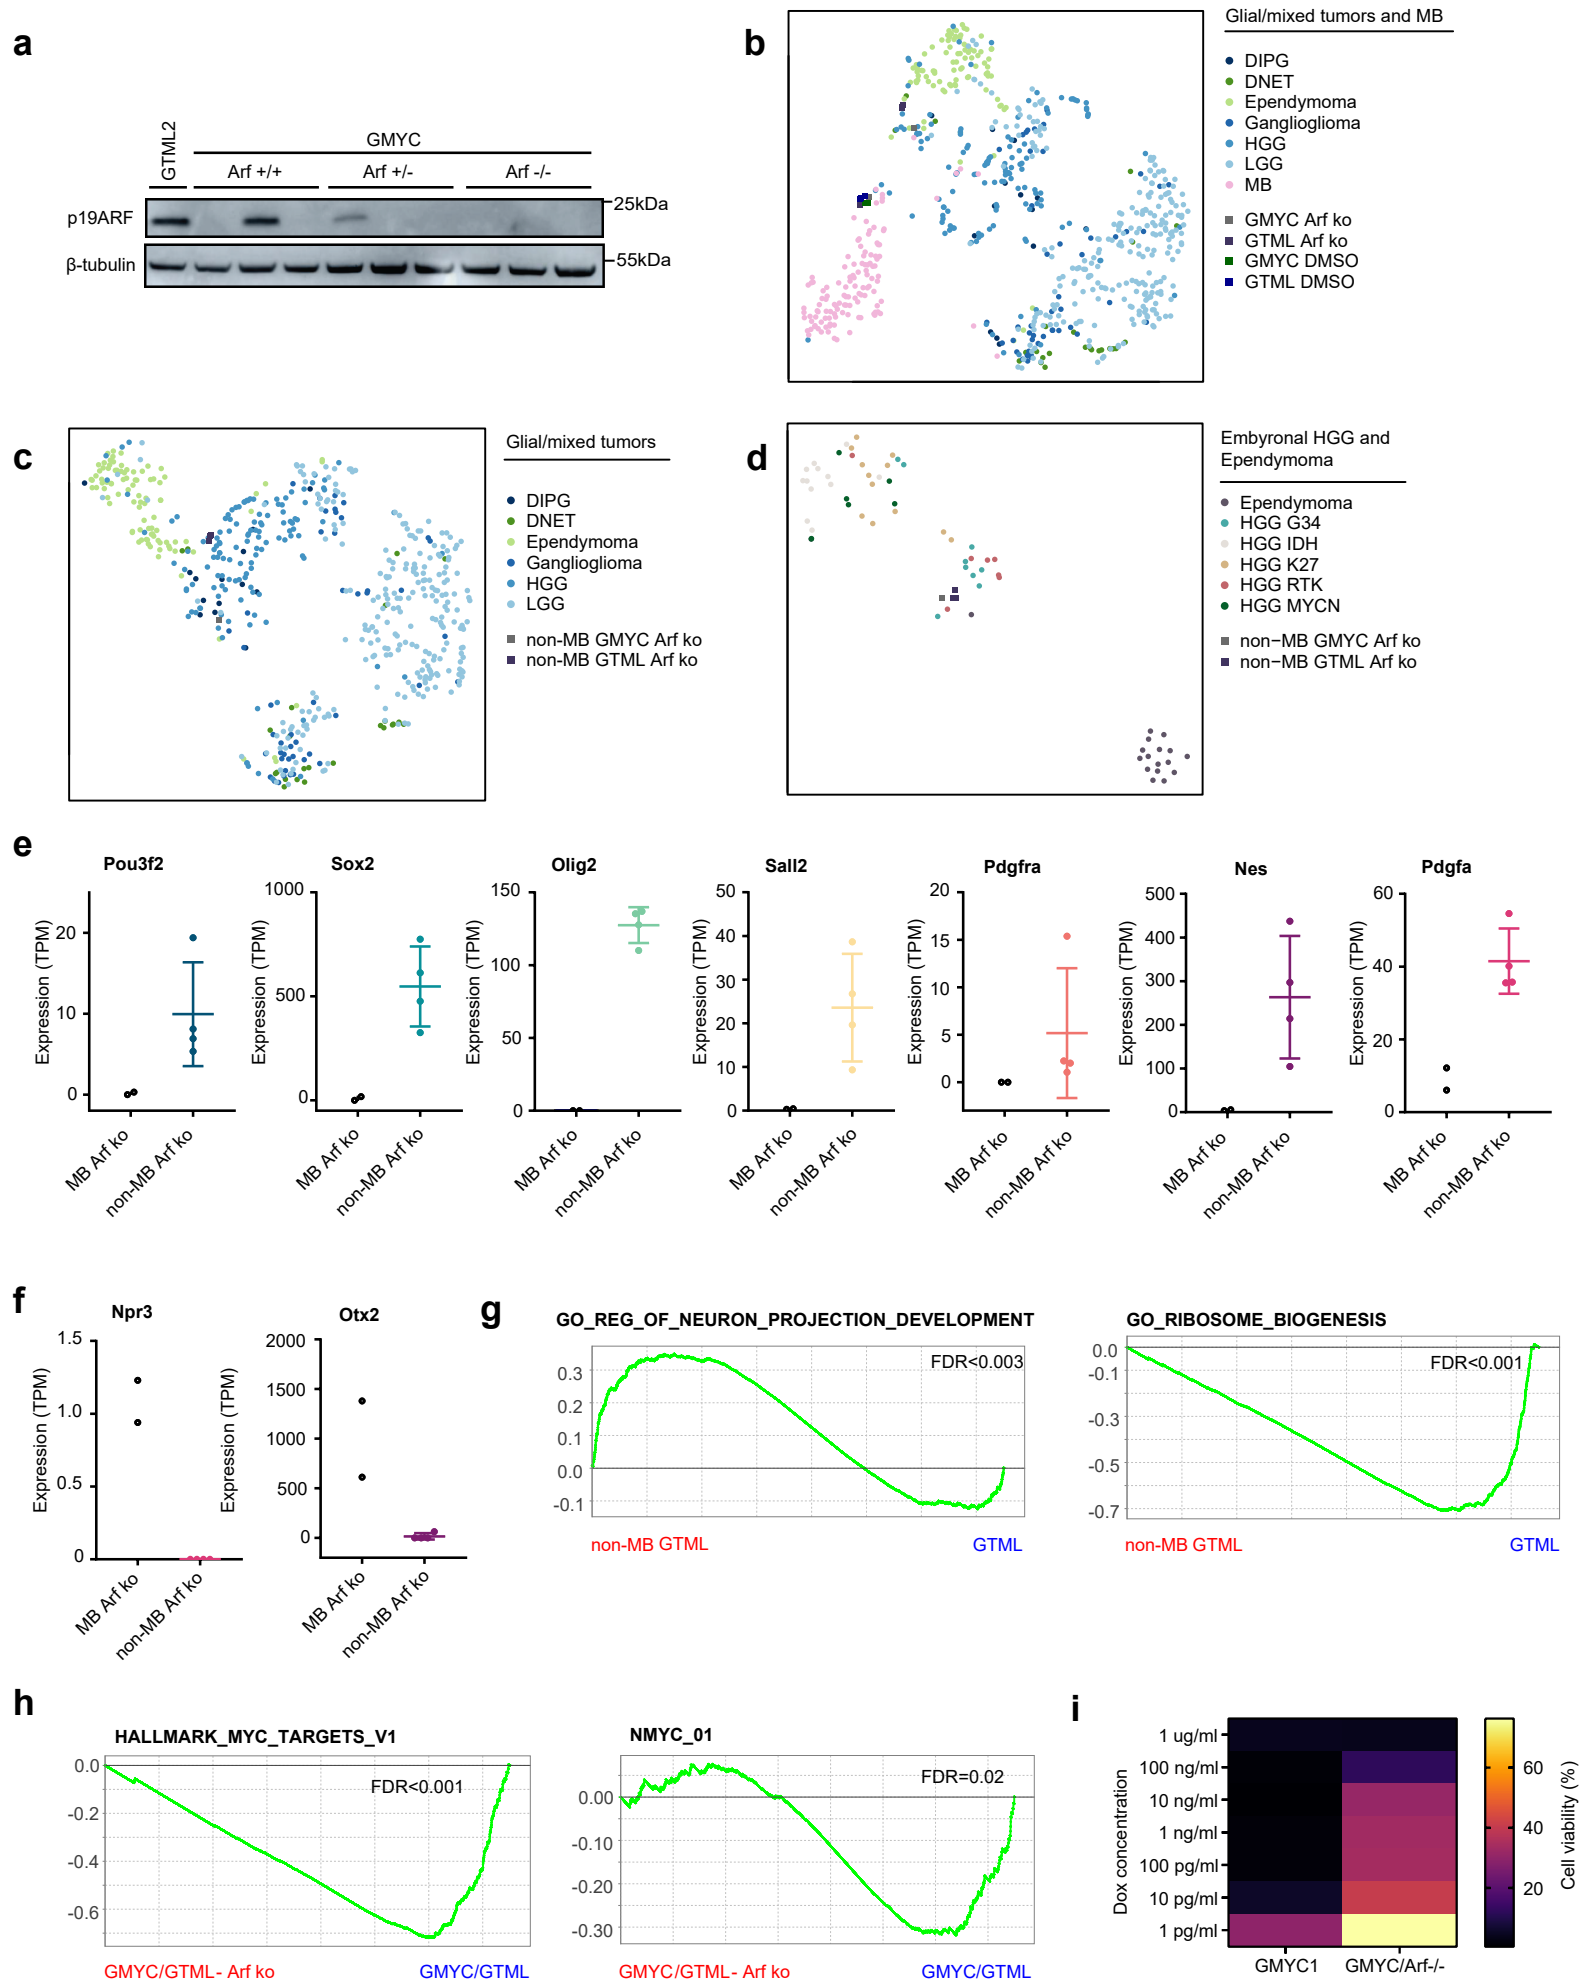

**Supplementary Fig. 5. ARF depleted GMYC/GTML animals promote an increased glioma-like tumor development.**

**a.** Protein analysis of p19ARF in the GTML2 cell line and fresh tumor biopsies taken from GMYC mice that were wildtype for *Cdkn2a/p19Arf* or had partial or complete knockout of the *Arf* gene.

**b-d.** tSNE plots for the *Arf* ko GMYC and GTML tumours (colored squares) that appear to be either MB-like resembling human MB (pink) or non-MB-like and then more closely similar to human HGG-G34 or HGG-RTKs when performing cross-species RNA seq analysis. The same human data sets from Supplementary Fig. 1 were used here.

**e.** Transcriptional profiling expression patterns for markers defining glioma propagation transcription factors (*Pou3f2*, *Sall2*, *Sox2*, *Olig2*) and upregulation of *Pdgfra*, *Nes* and *Pdgfa* commonly involved in HGG-RTKs. MB *Arf* ko (n = 2). Non-MB *Arf* ko (n = 4). Scatter dot plot presented as mean values +/- SD for non-MB *Arf* ko.

**f.** Transcriptional profiling expression patterns for Group 3 MB-specific markers (*Npr3* and *Otx2*) lost in HGGs. MB *Arf* ko (n = 2). Non-MB *Arf* ko (n = 4). Scatter dot plot presented as mean values +/- SD for non-MB *Arf* ko.

**g.** Significant gene set enrichment in regulation of neuron projection development (GO\_REGULATION\_OF\_NEURON\_PROJECTION\_DEVELOPMENT) in non-MB GTML tumors as compared to MB GTML tumors in were ribosome biogenesis (GO\_RIBOSOME\_BIOGENESIS) instead was significantly enriched.

**h.** Significant gene set enrichment of MYC hallmark gene sets (HALLMARK\_MYC\_TARGETS\_V1) and MYCN target gene sets (NMYC\_01.v7.5.1 from GSE107405) in *Arf* wild type as compared to *Arf* knock out GTML and GMYC tumor lines.

**i.** Heat map showing cell viability of GMYC1 and GMYC *Arf* ko cells based on Alamar Blue assay after 72 h dox treatment at various concentrations as indicated. A significant difference ( $p < 0.05$ ) in response was found between the lines when using a two-tailed Student's t-test.

All experimental data from immunostainings (a) or treatments (i) was verified from at least two independent biological replicates.

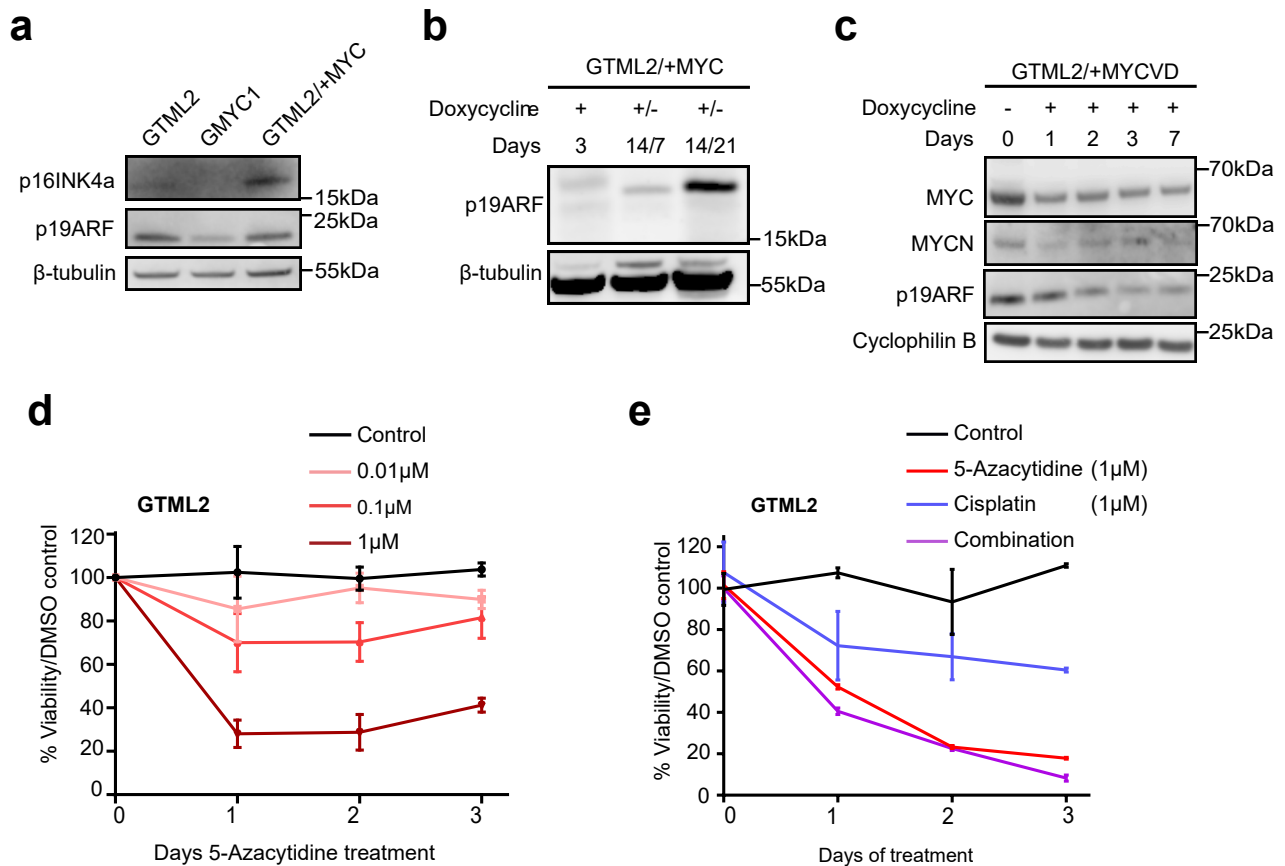

**Supplementary Fig. 6. MYC is suppressing ARF levels and MYCN-driven GTML2 cells treated with 5-Azacytidine show a decrease in cell survival.**

**a.** Protein analysis of p16INK4a and p19ARF in untreated GTML2, GMYC1, and GTML2/+MYC cell lines.

**b.** Protein analysis of GTML2/+MYC cell line during dox treatment. 14/7 and 14/21 indicate days of dox treatment and days released from treatment. MYC promotes temporary de novo methylation of the *ARF* gene, indicated with less protein. Removal from dox, and hence restoration of the original MYCN driver, leads to restoration of the *ARF* gene and its product.

**c.** GTML2/+MYCVD cells treated with dox in vitro over a period of 7 days show stable levels of MYC, a decrease of MYCN levels during dox treatment, and reduction of total ARF protein.

**d.** GTML2 cells were treated in vitro with 5-Azacytidine over 3 days. The highest concentration (1  $\mu$ mol/L) caused a reduction in cell viability and proliferation.  $n = 3$  for each treatment variable. Mean  $\pm$  SD.

**e.** GTML2 cells were then treated in vitro with 5-Azacytidine (demethylation), cisplatin (alkylation), or combination treatment over 3 days. Independent treatments saw a reduction in cell viability and proliferation.  $n = 3$  for each treatment variable. Mean  $\pm$  SD. All experimental data from immunostainings (**a-c**) and treatments (**d-e**) was verified from at least 2 biological replicates.

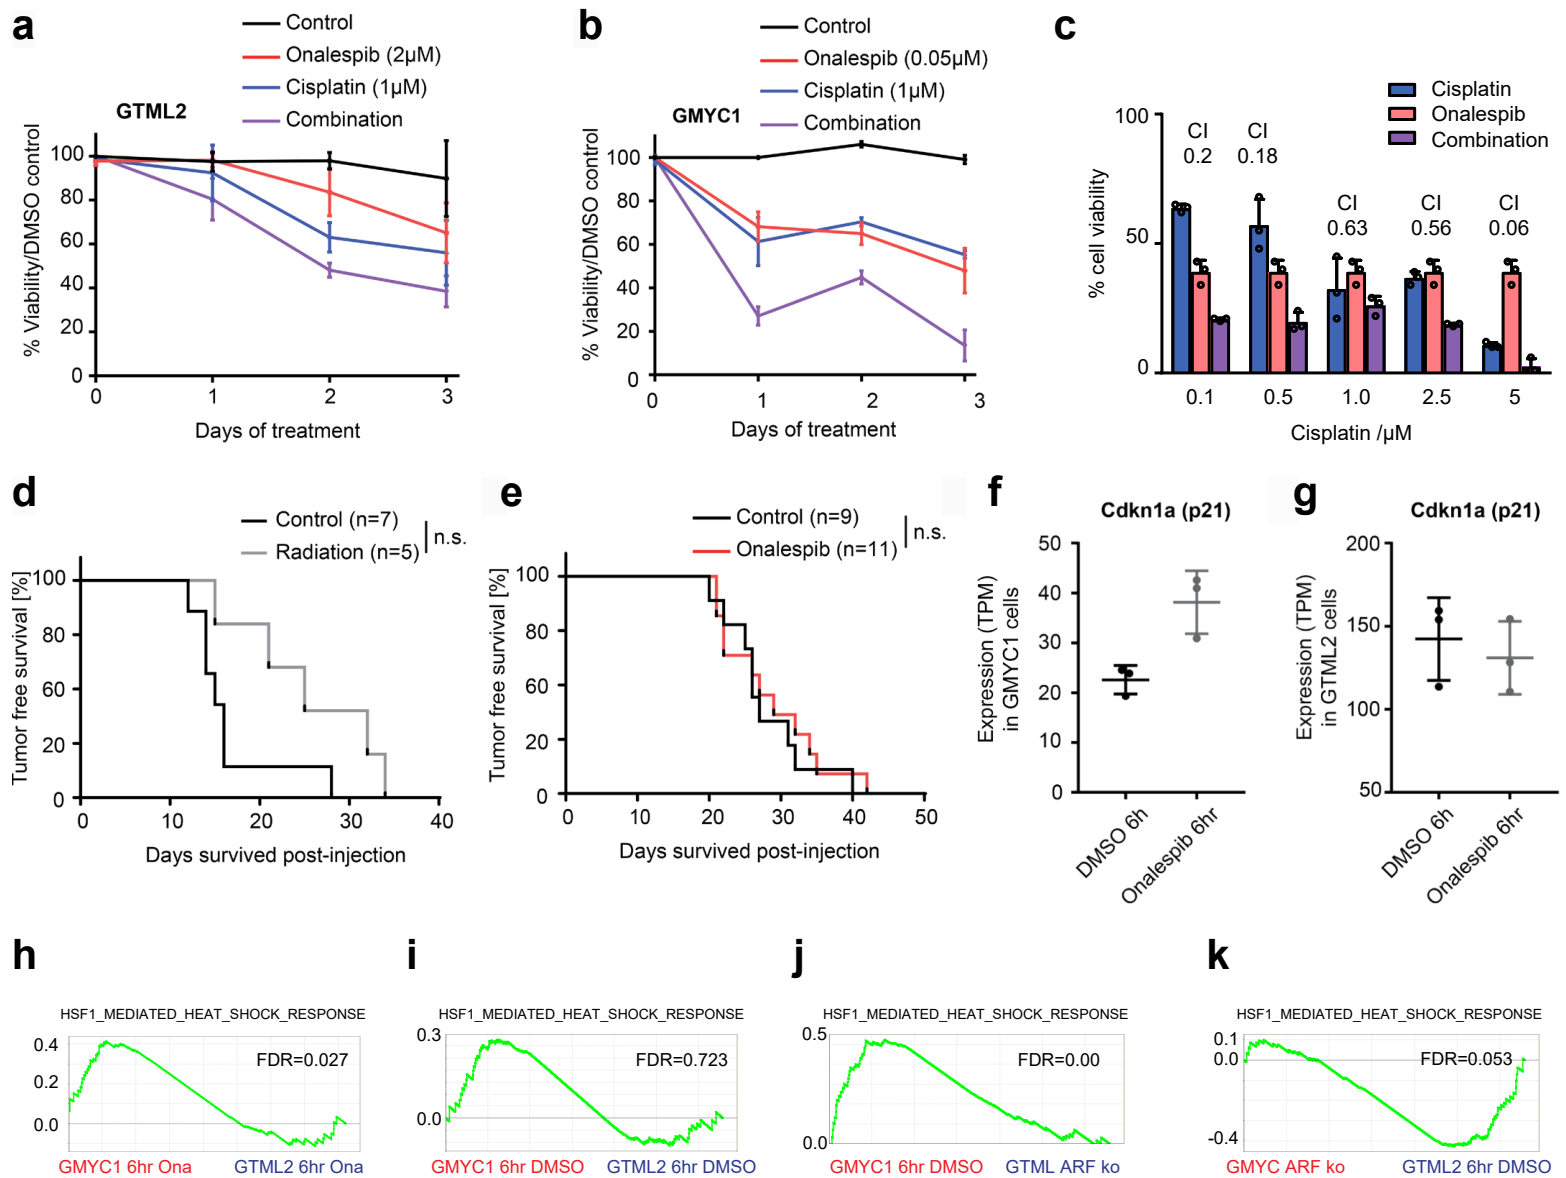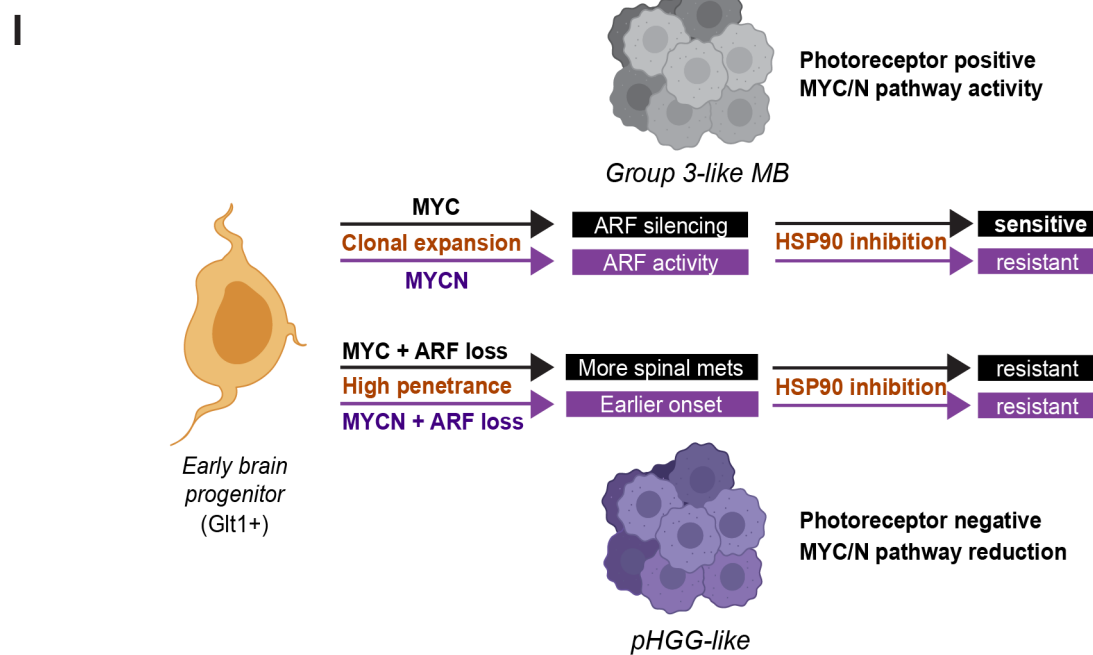



**Supplementary Fig. 7. MYC-driven MB-like tumors are more sensitive to HSP90 inhibition as compared to MYCN-driven MB-like tumors.**

- a.** GTML2 cells treated with Onalespib, cisplatin or combination treatment over 3 days. Independent treatments reduced cell viability. Combinatorial treatment was non-significant nor synergistic  $n = 3$  for each treatment variable. Mean  $\pm$  SD.
- b.** GMYC1 cells treated with Onalespib, cisplatin, or combination treatment over 3 days. Independent treatments reduced cell viability.  $n = 3$  for each treatment variable. Mean  $\pm$  SD.
- c.** Synergism scores and combinatorial index (CI) from GMYC1 cells treated with Onalespib (0.1 $\mu$ M) and varying conc. of cisplatin over 3 days. The combinatorial treatment had a synergistic effect on these cells.  $n = 3$  for each treatment variable. Mean  $\pm$  SD.
- d.** GMYC/TetGFP/Luc cells injected into the cerebellum of immunocompetent mice, which underwent a daily regimen of 2 Gy irradiation for 5 days or received I.P. injections of vehicle (2-hydroxypropyl- $\beta$ -cyclodextrin). Irradiation increased overall survival but was not significant ( $p=0.0536$ ). Log-rank Mantel-Cox statistical test.
- e.** GMYC/ARFKO cells injected into the cerebellum of immunocompetent mice, which underwent daily I.P. injections of 20 mg/kg of Onalespib or vehicle (2-hydroxypropyl- $\beta$ -cyclodextrin) for 4 days. Onalespib treatment did not significantly increase survival ( $p=0.7857$ ). Log-rank Mantel-Cox statistical test.
- f-g.** RNA expression data of GMYC1 and GTML2 cells treated with high-dose Onalespib over 6 hours. *p21* expression increased in GMYC1 cells as compared to GTML2 cells, indicative of HSP90 inhibitory treatment and subsequent effects on MDM2 pathway. DMSO 6hr  $n = 3$ . Onalespib 6hr  $n = 3$ . Scatter dot plot presented as mean values  $\pm$  SD.
- h-k.** GSEA analysis of GMYC1 and GTML2 cells (treated with Onalespib, DMSO or with Arf ko) with enrichment of the REACTOME\_REGULATION\_OF\_HSF1\_MEDIATED\_HEAT\_SHOCK\_RESPONSE gene set. Enrichments were considered significant if FDR < 0.05.
- l.** Overview of the distinct tumor development from Glt1-positive brain cells in this model system. While MYC and MYCN both generate photoreceptor-positive brain tumors, MYC generates MB-like tumors that are sensitive to HSP90 inhibition. MYC-driven tumors show significantly lower ARF expression compared to MYCN-driven tumors. MYC or MYCN in combination with ARF depletion promotes formation of photoreceptor-negative pediatric HGG (pHGG)-like tumors that show less prominent MYC pathway dependency and less sensitivity to HSP90 inhibitors. Figure was partly created with BioRender.com.
- All experimental data from treatments (a-c) was verified in at least two independent biological replicates.

**Supplementary Table 1. Trp53 mutations found after sequencing of 24 GMYC and 12 GTML tumor biopsies.**

Sequencing results for evaluation of mutational status of *Trp53* in GMYC and GTML tumors.

| Sample        | Model | #CHROM | POS      | REF | ALT | Annotation                               | Annotation Impact | Variant Multiplicity | Gene Name | Gene_ID            | Feature_ID           | Transcript BioType | Rank | HGVS.c     | HGVS.p      | cDNA.pos /length | CDS.pos /length | AA.pos /length | Tot. depth | Variant depth | Allele freq |
|---------------|-------|--------|----------|-----|-----|------------------------------------------|-------------------|----------------------|-----------|--------------------|----------------------|--------------------|------|------------|-------------|------------------|-----------------|----------------|------------|---------------|-------------|
| Sample-5_S5   | GMYC  | chr11  | 69589629 | G   | C   | missense_variant                         | MODERATE          | 1                    | Trp53     | ENSMUSG00000059552 | ENSMUST00000108658.9 | protein_coding     | 8/11 | c.830G>C   | p.Arg277Thr | 987/1771         | 830/1173        | 277/390        | 167        | 49            | 29,34%      |
| Sample-9_S9   | GMYC  | chr11  | 69588362 | A   | T   | splice_acceptor_variant & intron_variant | HIGH              | 1                    | Trp53     | ENSMUSG00000059552 | ENSMUST00000108658.9 | protein_coding     | 4/10 | c.367-2A>T |             |                  |                 |                | 107        | 90            | 84,11%      |
| Sample-19_S3  | GMYC  | chr11  | 69588505 | G   | A   | missense_variant                         | MODERATE          | 1                    | Trp53     | ENSMUSG00000059552 | ENSMUST00000108658.9 | protein_coding     | 5/11 | c.508G>A   | p.Val170Met | 665/1771         | 508/1173        | 170/390        | 177        | 87            | 49,15%      |
| Sample-21_S5  | GMYC  | chr11  | 69588461 | G   | C   | missense_variant                         | MODERATE          | 3                    | Trp53     | ENSMUSG00000059552 | ENSMUST00000108658.9 | protein_coding     | 5/11 | c.464G>C   | p.Arg155Pro | 621/1771         | 464/1173        | 155/390        | 163        | 107           | 65,64%      |
| Sample-24_S8  | GMYC  | chr11  | 69589607 | C   | T   | missense_variant                         | MODERATE          | 1                    | Trp53     | ENSMUSG00000059552 | ENSMUST00000108658.9 | protein_coding     | 8/11 | c.808C>T   | p.Arg270Cys | 965/1771         | 808/1173        | 270/390        | 184        | 152           | 82,61%      |
| Sample-25_S9  | GMYC  | chr11  | 69588393 | C   | G   | missense_variant                         | MODERATE          | 3                    | Trp53     | ENSMUSG00000059552 | ENSMUST00000108658.9 | protein_coding     | 5/11 | c.396C>G   | p.Cys132Trp | 553/1771         | 396/1173        | 132/390        | 114        | 40            | 35,09%      |
| Sample-26_S10 | GMYC  | chr11  | 69589608 | G   | T   | missense_variant                         | MODERATE          | 1                    | Trp53     | ENSMUSG00000059552 | ENSMUST00000108658.9 | protein_coding     | 8/11 | c.809G>T   | p.Arg270Leu | 966/1771         | 809/1173        | 270/390        | 197        | 92            | 46,70%      |
| Sample-27_S11 | GMYC  | chr11  | 69589608 | G   | A   | missense_variant                         | MODERATE          | 1                    | Trp53     | ENSMUSG00000059552 | ENSMUST00000108658.9 | protein_coding     | 8/11 | c.809G>A   | p.Arg270His | 966/1771         | 809/1173        | 270/390        | 148        | 89            | 60,14%      |
| Sample-27_S11 | GMYC  | chr11  | 69589635 | G   | A   | missense_variant                         | MODERATE          | 1                    | Trp53     | ENSMUSG00000059552 | ENSMUST00000108658.9 | protein_coding     | 8/11 | c.836G>A   | p.Arg279His | 993/1771         | 836/1173        | 279/390        | 164        | 54            | 32,93%      |
| Sample-28_S12 | GMYC  | chr11  | 69588382 | A   | G   | missense_variant                         | MODERATE          | 1                    | Trp53     | ENSMUSG00000059552 | ENSMUST00000108658.9 | protein_coding     | 5/11 | c.385A>G   | p.Lys129Glu | 542/1771         | 385/1173        | 129/390        | 106        | 94            | 88,68%      |
| Sample-31_S15 | GMYC  | chr11  | 69589210 | C   | T   | missense_variant                         | MODERATE          | 1                    | Trp53     | ENSMUSG00000059552 | ENSMUST00000108658.9 | protein_coding     | 7/11 | c.733C>T   | p.Arg245Cys | 890/1771         | 733/1173        | 245/390        | 129        | 109           | 84,50%      |
| Sample-37_S21 | GTML  | chr11  | 69588461 | G   | C   | missense_variant                         | MODERATE          | 3                    | Trp53     | ENSMUSG00000059552 | ENSMUST00000108658.9 | protein_coding     | 5/11 | c.464G>C   | p.Arg155Pro | 621/1771         | 464/1173        | 155/390        | 188        | 96            | 51,06%      |
| Sample-40_S24 | GTML  | chr11  | 69588512 | G   | A   | missense_variant                         | MODERATE          | 2                    | Trp53     | ENSMUSG00000059552 | ENSMUST00000108658.9 | protein_coding     | 5/11 | c.515G>A   | p.Arg172His | 672/1771         | 515/1173        | 172/390        | 168        | 138           | 82,14%      |
| Sample-40_S24 | GTML  | chr11  | 69588393 | C   | G   | missense_variant                         | MODERATE          | 3                    | Trp53     | ENSMUSG00000059552 | ENSMUST00000108658.9 | protein_coding     | 5/11 | c.396C>G   | p.Cys132Trp | 553/1771         | 396/1173        | 132/390        | 144        | 17            | 11,81%      |
| Sample-42_S26 | GTML  | chr11  | 69588461 | G   | C   | missense_variant                         | MODERATE          | 3                    | Trp53     | ENSMUSG00000059552 | ENSMUST00000108658.9 | protein_coding     | 5/11 | c.464G>C   | p.Arg155Pro | 621/1771         | 464/1173        | 155/390        | 210        | 86            | 40,95%      |
| Sample-44_S28 | GTML  | chr11  | 69588463 | G   | C   | missense_variant                         | MODERATE          | 1                    | Trp53     | ENSMUSG00000059552 | ENSMUST00000108658.9 | protein_coding     | 5/11 | c.466G>C   | p.Ala156Pro | 623/1771         | 466/1173        | 156/390        | 159        | 88            | 55,35%      |
| Sample-44_S28 | GTML  | chr11  | 69588393 | C   | G   | missense_variant                         | MODERATE          | 3                    | Trp53     | ENSMUSG00000059552 | ENSMUST00000108658.9 | protein_coding     | 5/11 | c.396C>G   | p.Cys132Trp | 553/1771         | 396/1173        | 132/390        | 106        | 33            | 31,13%      |
| Sample-47_S31 | GTML  | chr11  | 69588512 | G   | A   | missense_variant                         | MODERATE          | 2                    | Trp53     | ENSMUSG00000059552 | ENSMUST00000108658.9 | protein_coding     | 5/11 | c.515G>A   | p.Arg172His | 672/1771         | 515/1173        | 172/390        | 121        | 32            | 26,45%      |

| <b>Supplementary Table 2. Gene set enrichment analysis in GMYC1 and GTML2 cells after HSP90 inhibition</b> |            |                    |             |
|------------------------------------------------------------------------------------------------------------|------------|--------------------|-------------|
| <b><i>Significantly enriched in GMYC1 cells after 6h Onalespib treatment*</i></b>                          | <b>NES</b> | <b>FDR q-val**</b> | <b>SIZE</b> |
| REACTOME_COMPLEMENT_CASCADE                                                                                | 2,2338     | 0,0000             | 20          |
| KRIGE_AMINO_ACID_DEPRIVATION                                                                               | 2,1623     | 0,0023             | 22          |
| CONCANNON_APOPTOSIS_BY_EPOXOMICIN_UP                                                                       | 2,1341     | 0,0023             | 207         |
| ZHAN_MULTIPLE_MYELOMA_CD1_UP                                                                               | 2,1258     | 0,0018             | 39          |
| SU_KIDNEY                                                                                                  | 2,1201     | 0,0014             | 15          |
| HELLER_SILENCED_BY_METHYLATION_DN                                                                          | 2,1147     | 0,0016             | 85          |
| NIELSEN_SYNOVIAL_SARCOMA_DN                                                                                | 2,0916     | 0,0027             | 17          |
| KUROZUMI_RESPONSE_TO_ONCOCYTIC_VIRUS                                                                       | 2,0901     | 0,0025             | 40          |
| DELPUECH_FOXO3_TARGETS_DN                                                                                  | 2,0864     | 0,0027             | 32          |
| VANASSE_BCL2_TARGETS_UP                                                                                    | 2,0830     | 0,0027             | 30          |
| DAUER_STAT3_TARGETS_DN                                                                                     | 2,0487     | 0,0047             | 37          |
| GO_POSITIVE_REGULATION_OF_INTERLEUKIN_8_PRODUCTION                                                         | 2,0406     | 0,0048             | 41          |
| KEGG_COMPLEMENT_AND_COAGULATION_CASCADES                                                                   | 2,0287     | 0,0057             | 56          |
| GO_REGULATION_OF_INTERLEUKIN_8_PRODUCTION                                                                  | 2,0181     | 0,0065             | 55          |
| WANG_NEOPLASTIC_TRANSFORMATION_BY_CCND1_MYC                                                                | 2,0121     | 0,0067             | 20          |
| GAUSSMANN_MLL_AF4_FUSION_TARGETS_F_DN                                                                      | 2,0083     | 0,0069             | 30          |
| WENG_POR_TARGETS_LIVER_DN                                                                                  | 1,9849     | 0,0097             | 19          |
| GO_MONOCYTE_CHEMOTAXIS                                                                                     | 1,9845     | 0,0094             | 24          |
| GO_NEUTRAL_AMINO_ACID_TRANSPORT                                                                            | 1,9823     | 0,0099             | 33          |
| GO_CELLULAR_RESPONSE_TO_HEAT                                                                               | 1,9763     | 0,0102             | 30          |
| YORDY_RECIPROCAL_REGULATION_BY_ETS1_AND_SP100_DN                                                           | 1,9532     | 0,0120             | 63          |
| GO_L_AMINO_ACID_TRANSPORT                                                                                  | 1,9451     | 0,0138             | 56          |
| GO_NEURONAL_ACTION_POTENTIAL                                                                               | 1,9374     | 0,0149             | 27          |
| GO_CALCIIUM_ION_IMPORT                                                                                     | 1,9275     | 0,0164             | 60          |
| GO_MULTICELLULAR_ORGANISMAL_SIGNALING                                                                      | 1,9260     | 0,0165             | 119         |
| REACTOME_CHEMOKINE_RECEPTORS_BIND_CHEMOKINES                                                               | 1,9027     | 0,0228             | 33          |
| MIKKELSEN_IPS_ICP_WITH_H3K4ME3_AND_H327ME3                                                                 | 1,9024     | 0,0222             | 106         |
| SHIN_B_CELL_LYMPHOMA_CLUSTER_5                                                                             | 1,8859     | 0,0275             | 16          |
| MENSSEN_MYC_TARGETS                                                                                        | 1,8820     | 0,0282             | 45          |
| MIKKELSEN_MEF_LCP_WITH_H3K27ME3                                                                            | 1,8755     | 0,0299             | 58          |
| NIKOLSKY_BREAST_CANCER_1Q21_AMPLICON                                                                       | 1,8625     | 0,0352             | 35          |
| REACTOME_ACTIVATION_OF_GENES_BY_ATF4                                                                       | 1,8594     | 0,0360             | 22          |
| CUI_TCF21_TARGETS_DN                                                                                       | 1,8592     | 0,0352             | 25          |
| KEGG_AUTOIMMUNE_THYROID_DISEASE                                                                            | 1,8568     | 0,0353             | 25          |
| HANN_RESISTANCE_TO_BCL2_INHIBITOR_DN                                                                       | 1,8546     | 0,0353             | 44          |
| ODONNELL_TARGETS_OF_MYC_AND_TFRC_UP                                                                        | 1,8514     | 0,0364             | 63          |
| REACTOME_AMINO_ACID_TRANSPORT_ACROSS_THE_PLASMA_MEMBRANE                                                   | 1,8506     | 0,0359             | 29          |
| GAUSSMANN_MLL_AF4_FUSION_TARGETS_D_UP                                                                      | 1,8478     | 0,0362             | 34          |
| KEGG_INTESTINAL_IMMUNE_NETWORK_FOR_IGA_PRODUCTION                                                          | 1,8404     | 0,0394             | 30          |
| VECCHI_GASTRIC_CANCER_EARLY_DN                                                                             | 1,8397     | 0,0388             | 287         |
| GO_ACTION_POTENTIAL                                                                                        | 1,8331     | 0,0412             | 89          |
| GO_CHAPERONE_MEDIATED_PROTEIN_FOLDING                                                                      | 1,8238     | 0,0459             | 44          |
| GAJATE_RESPONSE_TO_TRABECTEDIN_UP                                                                          | 1,8187     | 0,0473             | 54          |
| GO_REGULATION_OF_CELLULAR_RESPONSE_TO_HEAT                                                                 | 1,8158     | 0,0484             | 69          |
| GO_MEMBRANE_DEPOLARIZATION_DURING_ACTION_POTENTIAL                                                         | 1,8149     | 0,0480             | 38          |
| HUMMERICH_MALIGNANT_SKIN_TUMOR_DN                                                                          | 1,8147     | 0,0470             | 15          |
| GO_CALCIIUM_ION_IMPORT_INTO_CYTOSOL                                                                        | 1,8134     | 0,0469             | 40          |
| LEI_HOXC8_TARGETS_DN                                                                                       | 1,8070     | 0,0499             | 15          |

**Significantly enriched in GTML2 cells after 6h Onalespib treatment**

|                                                          |        |        |     |
|----------------------------------------------------------|--------|--------|-----|
| ZHAN_MULTIPLE_MYELOMA_CD1_VS_CD2_UP                      | 2,2033 | 0,0000 | 55  |
| REACTOME_OLFACTORY_SIGNALING_PATHWAY                     | 2,0985 | 0,0018 | 176 |
| TIEN_INTESTINE_PROBIOTICS_24HR_DN                        | 2,0950 | 0,0012 | 188 |
| KEGG_ANTIGEN_PROCESSING_AND_PRESENTATION                 | 2,0723 | 0,0018 | 44  |
| KRIGE_AMINO_ACID_DEPRIVATION                             | 2,0167 | 0,0055 | 22  |
| NIELSEN_SCHWANNOMA_UP                                    | 1,9763 | 0,0110 | 16  |
| GO_RESPONSE_TO_TOPOLOGICALLY_INCORRECT_PROTEIN           | 1,9567 | 0,0151 | 142 |
| ZHAN_MULTIPLE_MYELOMA_CD1_UP                             | 1,9479 | 0,0156 | 39  |
| GO_ENDOPLASMIC_RETICULUM_TO_CYTOSOL_TRANSPORT            | 1,9162 | 0,0236 | 20  |
| GROSS_HYPOXIA_VIA_ELK3_ONLY_UP                           | 1,9076 | 0,0253 | 28  |
| WU_ALZHEIMER_DISEASE_DN                                  | 1,9014 | 0,0258 | 16  |
| PACHER_TARGETS_OF_IGF1_AND_IGF2_UP                       | 1,8786 | 0,0343 | 33  |
| GO_PROTEIN_REFOLDING                                     | 1,8762 | 0,0332 | 18  |
| GO_RESPONSE_TO_PH                                        | 1,8742 | 0,0322 | 36  |
| HALLMARK_UNFOLDED_PROTEIN_RESPONSE                       | 1,8650 | 0,0355 | 100 |
| SHIN_B_CELL_LYMPHOMA_CLUSTER_5                           | 1,8637 | 0,0341 | 16  |
| REACTOME_AMINO_ACID_TRANSPORT_ACROSS_THE_PLASMA_MEMBRANE | 1,8529 | 0,0391 | 29  |

*\*Significantly enriched publically available gene sets in GMYC1 or GTML2 cells after 6 hours of Onalespib treatment from AmpliSeq RNA sequencing analysis.*

*\*\*Cut off FDR q-val<0,05.*
